# Supplementary material for: Genome-wide identification of miRNAs and their targets during early somatic embryogenesis in Dimocarpus longan Lour
Source: PubMed Central journal article supplement (PMC7069941; doi:10.1038/s41598-020-60946-y), 2020-03-13
Supplement: 41598_2020_60946_MOESM14_ESM.pdf [file 41598_2020_60946_MOESM14_ESM.pdf]

A

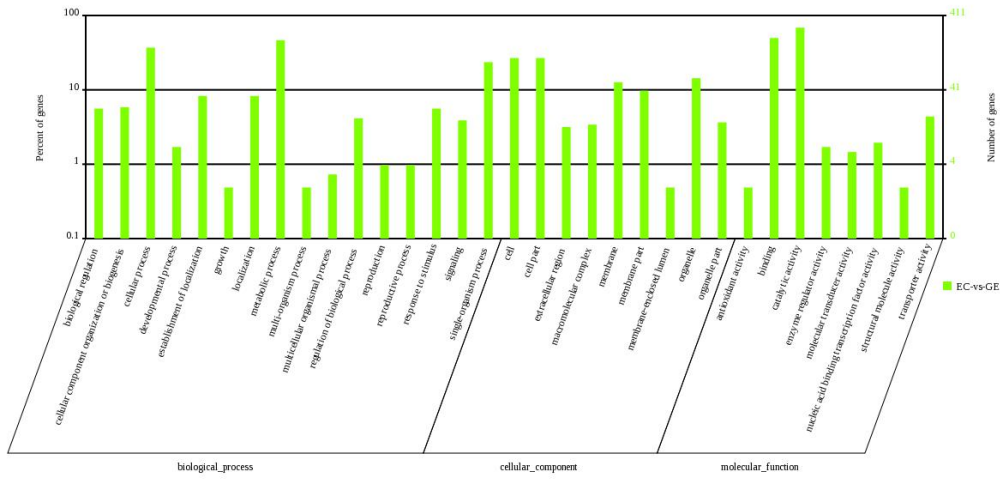

B

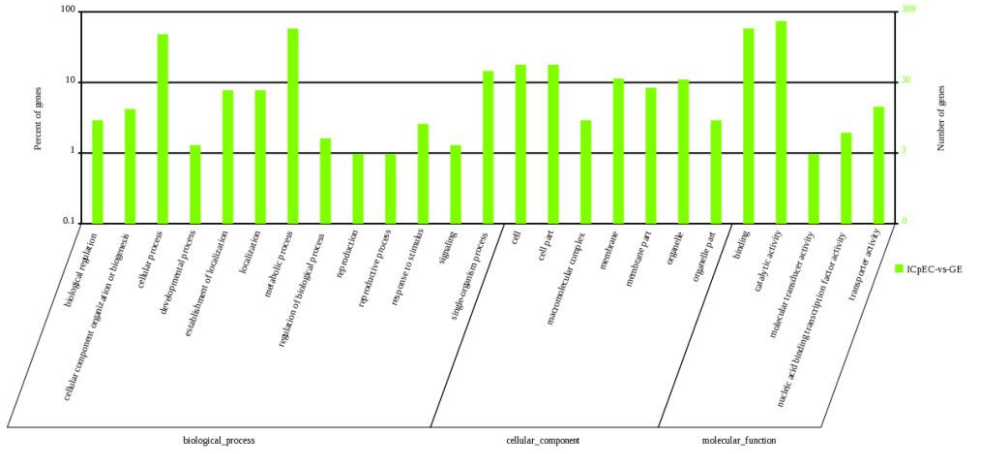

C

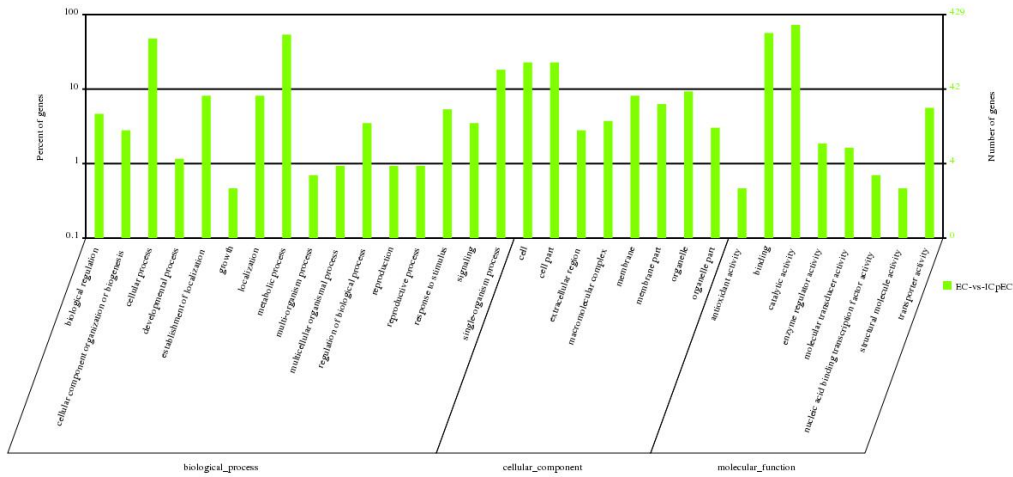

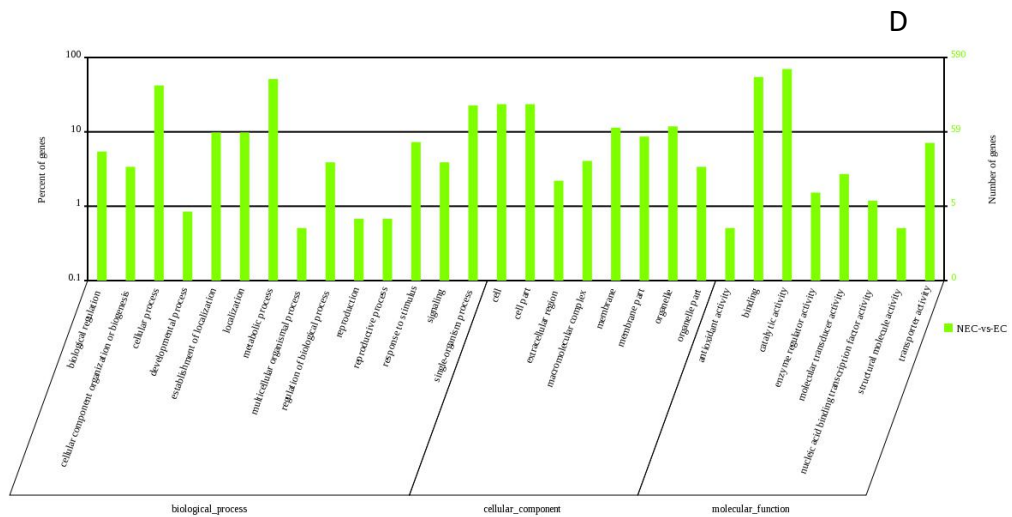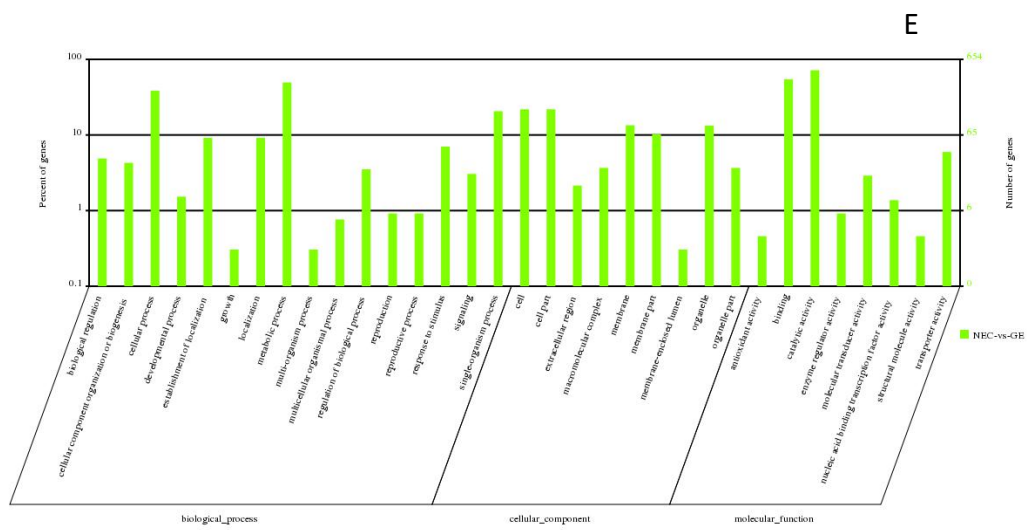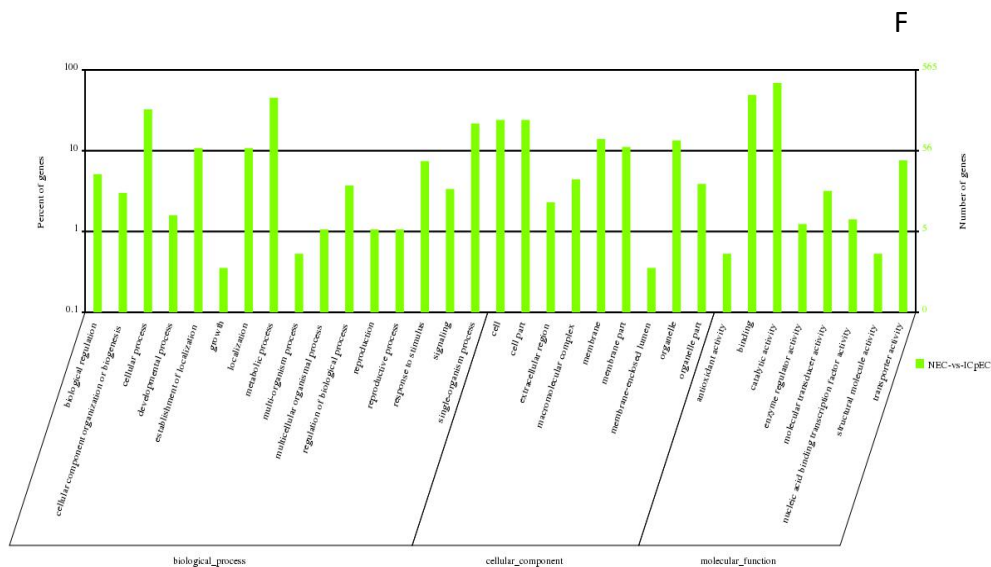

Figure S1. Enrichment analysis mapped to longan genome during different early somatic embryogenesis of longan.

A, B, C, D, E, F represent EC-vs-GE, ICpEC-vs-GE, EC-vs-ICpGE, NEC-vs-EC, NEC-vs-GE, NEC-vs-ICpEC.
