# Supplementary material for: Genome-wide identification of miRNAs and their targets during early somatic embryogenesis in Dimocarpus longan Lour
Source: PubMed Central journal article supplement (PMC7069941; doi:10.1038/s41598-020-60946-y), 2020-03-13
Supplement: 41598_2020_60946_MOESM15_ESM.pdf [file 41598_2020_60946_MOESM15_ESM.pdf]

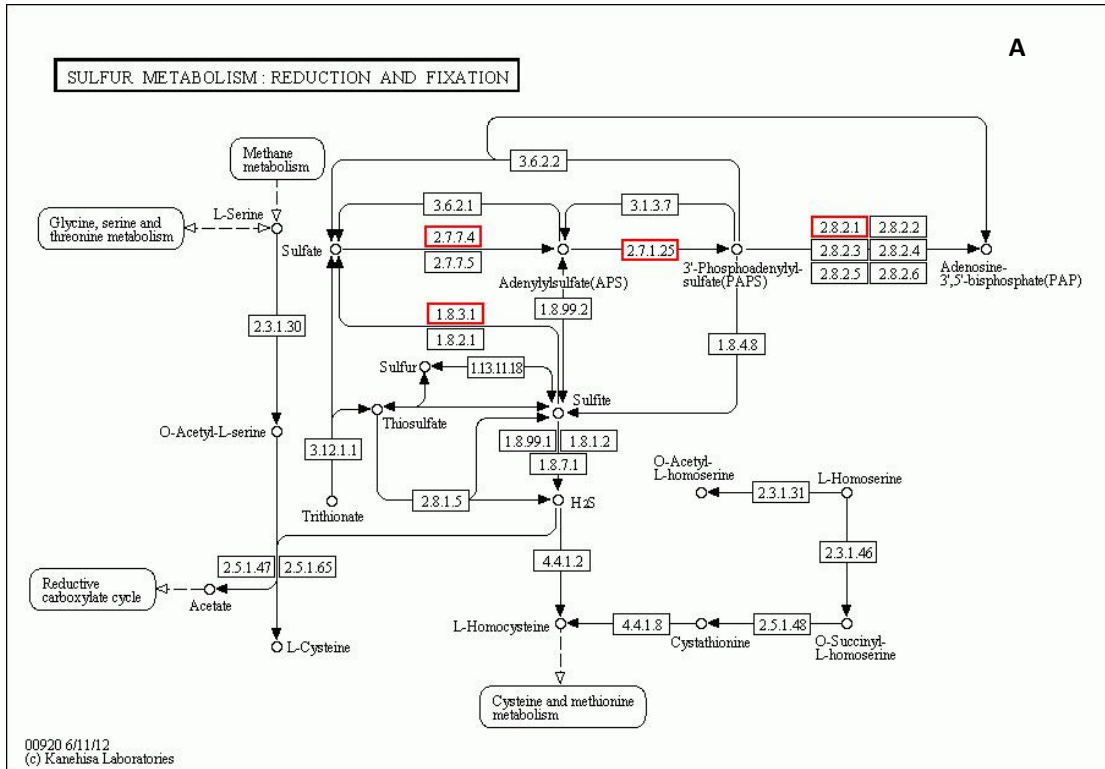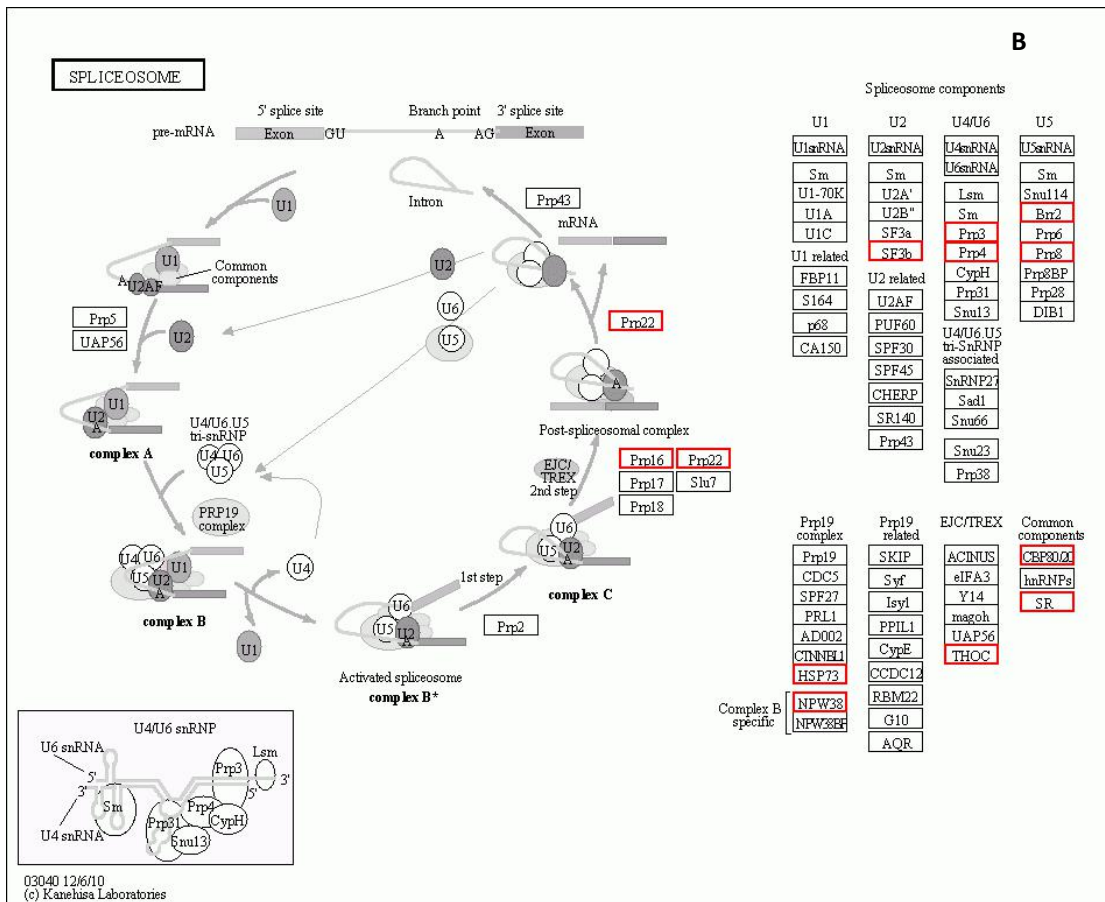

PLANT HORMONE SIGNAL TRANSDUCTION

C

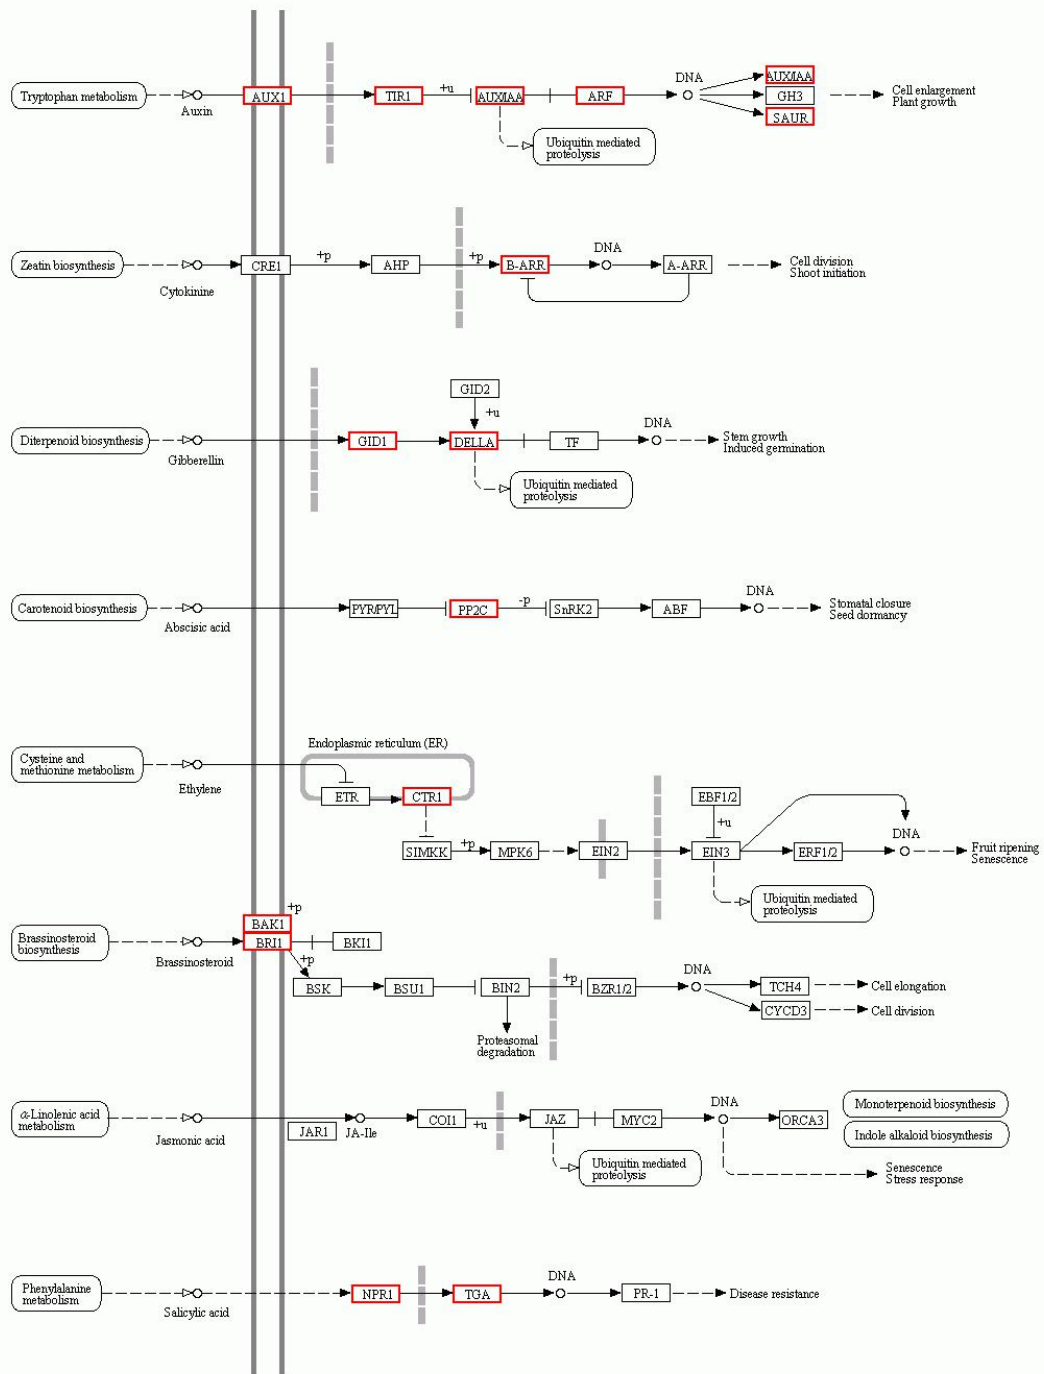

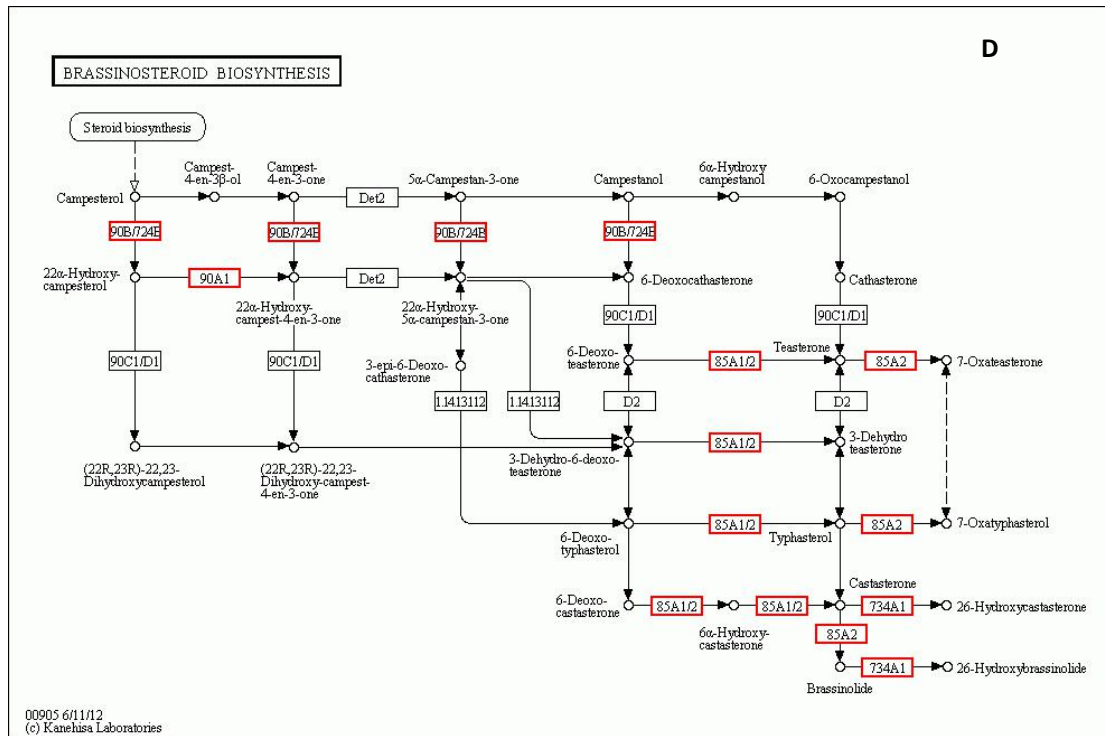

**Figure S2. Some metabolic pathway of significant enrichment in the first 20 sites of KEGG.**

A represents sulfur metabolism pathway, B represents alternative splicing, C represents plant hormone signal transduction, D represents Brassinosteroid biosynthesis.
